# Supplementary material
Source: publisher site journal article supplement (https://www.dovepress.com/article/supplementary_file/616235/616235_Supplementary%20Material.docx)
Supplement: Supplementary file 1 [file 616235_Supplementary%20Material.docx]

**Table S1. Cumulative incidence of SPMs according to BTK inhibitor exposure**

| Group | 5-year CIF | 10-year CIF | 12-year CIF | Gray’s test P |
| --- | --- | --- | --- | --- |
| No BTK inhibitor | 2.57% | 2.85% | 3.42% | 0.007 |
| BTK inhibitor | 7.92% | 7.92% | 7.92% |  |
